# Supplementary material
Source: PubMed Central journal article supplement (PMC3726176)
Supplement: JCI70212sd.pdf [file JCI70212sd.pdf]

**SUPPLEMENTAL TABLE S1:** overview of clinical results obtained for anti-VEGF agents

| ANTI-ANGIOGENIC DRUG               | INDICATION (TUMOR TYPE) | TUMOR STAGE / TREATMENT SETTING A | TREATMENT                                                                        | PATIENTS (N) | IMPROVEMENT OF PFS (MONTHS) B                                                                                                    | IMPROVEMENT OF OS (MONTHS) B | REFERENCE        |
|------------------------------------|-------------------------|-----------------------------------|----------------------------------------------------------------------------------|--------------|----------------------------------------------------------------------------------------------------------------------------------|------------------------------|------------------|
| <b>Bevacizumab (BV) (Avastin®)</b> | Breast Cancer           | Metastatic / 2nd or 3rd line      | Capecitabine ± BV (15 mg/kg) (3-weekly)                                          | 462          | Not improved                                                                                                                     | Not improved                 | AVF2119 [133]    |
|                                    |                         | Metastatic / 1st line             | Paclitaxel ± BV (10 mg/kg) (2-weekly)                                            | 722          | 11.8 vs. 5.9 (p<0.0001)                                                                                                          | Not improved                 | E2100 [134]      |
|                                    |                         | Metastatic / 1st line             | Docetaxel ± BV (7.5 mg/kg) or BV (15 mg/kg) (BV 3-weekly)                        | 736          | 10.0 vs. 8.1 (p<0.001) (BV 15mg/kg)<br>10.0 vs 9.0 (p=0.45) (BV 7.5mg/kg)                                                        | Not reported (NR)            | AVADO [135]      |
|                                    |                         | Metastatic / 1st line             | Capecitabine, Taxane or Anthracycline-based treatment ± BV (15 mg/kg) (-3weekly) | 1237         | Capecitabine cohort: 8.6 vs. 5.7 (p<0.001)<br>Taxane/Anthracycline cohort: 9.2 vs. 8.0 (p=<0.001)                                | Not improved                 | RIBBON-1 [133]   |
|                                    |                         | Metastatic / 2nd line             | Chemotherapy* ± BV (15 mg/kg)(3-weekly)                                          | 684          | 7.2 vs. 5.1 (P=0.0072)                                                                                                           | Not improved.                | RIBBON-2 [133]   |
|                                    | Colorectal Cancer       | Neoadjuvant                       | Epirubicin / Cyclophosphamide / Docetaxel ± BV (15mg/kg) (3-weekly)              | 1948         | Rate of pathological complete response§: 14.9% vs. 18.4% (p=0.04)                                                                | NR                           | GeparQuinto [80] |
|                                    |                         | Metastatic / 1st line             | IFL ± BV (5mg/kg) (2-weekly)                                                     | 813          | 10.6 vs. 6.2 (p<0.001)                                                                                                           | 20.3 vs. 15.6 (p<0.001)      | AVF2107 [136]    |
|                                    |                         | Metastatic / 1st line             | FOLFOX /XELOX ± BV (7.5mg/kg) (2-weekly with FOLFOX, 3-weekly with XELOX)        | 1401         | 9.4 vs. 8.0 (p=0.023)                                                                                                            | 21.3 v. 19.9 (p=0.077)       | N016966 [133]    |
|                                    |                         | Metastatic / 2nd line             | FOLFOX ± BV (10 mg/kg) (2-weekly)                                                | 829          | 7.3 vs. 4.7 (p<0.0001)                                                                                                           | 12.9 vs. 10.8 (p=0.011)      | E3200 [137]      |
|                                    |                         | Metastatic / 1st line             | Capecitabine and Capecitabine/Mitomycin ± BV (7.5 mg/kg)(3-weekly)               | 471          | 8.5 vs. 5.7 (p<0.001) (Capecitabine vs Capecitabine/BV)<br>8.4 vs. 5.7 (p<0.001) (Capecitabine vs. Capecitabine / Mitomycin /BV) | Not improved                 | MAX III [137]    |

|                      |                                                               |                                                                                                                 |                |                                                                                                           |                                                                     |                   |
|----------------------|---------------------------------------------------------------|-----------------------------------------------------------------------------------------------------------------|----------------|-----------------------------------------------------------------------------------------------------------|---------------------------------------------------------------------|-------------------|
|                      | Metastatic / 1st line                                         | FOLFIRI /BV (5mg/kg) (2-weekly) vs. modified bolus ILF/BV (7.5mg/kg)(3-weekly)                                  | 117            | 11.2 vs. 8.3 (p=0.28)                                                                                     | Not yet reached vs. 19.2 (p=0.007)                                  | BICC-C [137]      |
|                      | Metastatic / 1st line                                         | BV (7.5mg/kg)(3-weekly) / Capecitabine/ Oxaliplatin ± Cetuximab                                                 | 755            | 9.4 vs. 10.7 (p=0.01) (decreased upon addition of Cetuximab)                                              | NR                                                                  | CAIRO2 [82]       |
|                      | Metastatic / 1st line                                         | BV (dose chosen by investigator, 2-weekly) / Irinotecan- or Oxaliplatin ± Panitumumab                           | 1053           | 10.0 vs. 11.7 (not significantly decreased upon addition of Panitumumab)                                  | 19.4 vs. 24.5 (significant) decreased upon addition of Panitumumab) | PACCE [133]       |
|                      | Metastatic / 1st line                                         | BV (5mg/kg, 2-weekly) + FOLFOX vs. BV (5mg/kg, 2-weekly) + FOLF + Cetuximab                                     | 247            | Not improved                                                                                              | Not improved                                                        | [138]             |
|                      | Metastatic / 2nd line after BV progression                    | Infusional or bolus fluorouracil with Irinotecan or Oxaliplatin ± BV (5mg/kg if 2-weekly, 7.5mg/kg if 3-weekly) | 409            | 5.7 vs. 4.1 (p<0.0001)                                                                                    | 11.2 vs. 9.8 (p=0.0062)                                             | ML18147 [115]     |
|                      | Adjuvant                                                      | FOLFOX ± BV (5mg/kg, 2-weekly)                                                                                  | 2672           | Not improved                                                                                              | NR                                                                  | NSABPC-08 [113]   |
|                      | Adjuvant                                                      | FOLFOX c BV (5mg/kg, 2-weekly) and XELOX ± BV (7.5mg/kg, 3-weekly),                                             | 3451           | Not improved                                                                                              | Not improved                                                        | AVANT [133]       |
| NSCLC                | Locally advanced or metastatic (stage IIIB and IV) / 1st line | Carboplatin / Paclitaxel ± BV (15mg/kg, 3-weekly)                                                               | 878            | 6.2 vs. 4.5 (p<0.001)                                                                                     | 12.3 vs. 10.3 (p=0.003)                                             | ECOG-E4599 [137]  |
|                      | Locally advanced or metastatic (stage IIIB and IV) / 1st line | Cisplatin/ Gemcitabine ± BV (7.5 mg/kg or 15 mg/kg)                                                             | 1043           | Improved with BV: 7.5 mg/kg (p=0.0003) 15 mg/kg (p=0.0456)                                                | Not improved                                                        | AVAIL [139]       |
|                      | Recurrent /Refractory / 2nd line                              | Erlotinib ± BV (15mg/kg 3-weekly)                                                                               | 636            | 3.4 vs. 1.7 (significance not calculated for statistical reasons because primary endpoint OS not reached) | Not improved                                                        | BeTa[140]         |
| Renal Cell Carcinoma | Metastatic / 1st line                                         | Interferon α-2a ± BV (10mg/kg, 2-weekly)                                                                        | 649            | 10.2 vs. 5.4 (p<0.001)                                                                                    | Not improved                                                        | AVOREN [137]      |
|                      | Metastatic / 1st line                                         | Interferon alfa-2a ± BV (10 mg/kg                                                                               | 732            | NR                                                                                                        | Not improved                                                        | CALGB 90206 [141] |
| Glioblastoma         | Recurrent / 2nd line or higher                                | BV (10 mg/kg, 2 weekly) ± Irinotecan                                                                            | 167 (Phase II) | 5.6 vs. 4.2 (BV vs BV+Irinotecan)                                                                         | 9.2 vs. 8.7 (BV vs BV + Irinotecan)                                 | [142]             |
|                      | Recurrent / 2nd line or higher                                | BV (10 mg/kg, 2 weekly) monotherapy                                                                             | 48 (Phase II)  | 16 weeks (increased in comparison to a historic control group)                                            | 31 weeks (increased in comparison to a historic control group)      | [137]             |
| Ovarian Cancer       | High risk stage I-IIA, stage III/IV (all grades,              | Carboplatin/ Paclitaxel ± BV (7.5mg/kg, 3-weekly)                                                               | 1528           | 24.1 vs. 22.4 (p=0.04)                                                                                    | Not improved                                                        | ICON7 [123]       |

|                               |                                  |                                                                                           |                                                                       |      |                                |                           |                   |
|-------------------------------|----------------------------------|-------------------------------------------------------------------------------------------|-----------------------------------------------------------------------|------|--------------------------------|---------------------------|-------------------|
|                               |                                  | all histological types) / 1st line                                                        |                                                                       |      |                                |                           |                   |
|                               |                                  | Stage III/IV / 1st line                                                                   | Carboplatin / Paclitaxel ± BV (15 mg/kg) (cycles 2 to 22)             | 1873 | 14.1 vs. 10.3 (p<0,001)        | NR                        | GOG0218 [143]     |
|                               |                                  | Recurrent / 2nd line                                                                      | Gemcitabine / Carboplatin ± BV (15mg/kg, 3-weekly)                    | 484  | 12.8 vs. 8.4 (p<0.001)         | NR                        | OCEANS [144]      |
|                               | Gastric Cancer                   | Unresectable locally advanced or metastatic / 1st line                                    | Capecitabine or 5-FU and Cisplatin ± BV (7.5mg/kg, 3-weekly)          | 774  | 6.7 vs. 5.3 (p=0.037)          | Not improved              | AVAGAST [133]     |
|                               | Pancreatic Cancer                | Unresectable locally advanced or metastatic / 1st line                                    | Gemcitabine ± BV (10mg/kg, 2-weekly)                                  | 535  | Not improved                   | Not improved              | CALG80303 [145]   |
|                               |                                  | Metastatic / 1st line                                                                     | Gemcitabine / Erlotinib ± BV (5mg/kg, 2-weekly)                       | 301  | 4.6 vs. 3.6 (p=0.0002)         | Not improved              | AviTA [133]       |
|                               | Prostate Cancer                  | Metastatic, castration resistant / 1st line                                               | Docetaxel / Prednisolone ± BV (15mg/kg, 3-weekly)                     | 1050 | 9.9 vs. 7.5 (p<0.001)          | Not improved              | CALBG90401 [133]  |
| <b>Aflibercept (Zaltrap®)</b> | Colorectal Cancer                | Metastatic / 2nd line                                                                     | FOLFIRI ± Aflibercept (4mg/kg, 2-weekly)                              | 1226 | 6.9 vs. 4.67 (p<0.001)         | 13.5 vs. 12.06 (p=0.0032) | VELOUR [86]       |
|                               | Pancreatic Cancer                | Metastatic / 1st line                                                                     | Gemcitabine ± Aflibercept (4mg/kg, 2-weekly)                          | 546  | Not improved                   | Not improved              | VANILLA [133] #   |
|                               | NSCLC                            | Metastatic / 2nd line                                                                     | Docetaxel ± Aflibercept (6mg/kg, 3-weekly)                            | 913  | 5.2 vs. 4.1 (p=0.035)          | Not improved              | VITAL [146]       |
| <b>Sorafenib (Nexavar®)</b>   | Renal Cell Carcinoma             | Unresectable locally advanced or metastatic / 2nd line                                    | Sorafenib (400mg twice daily) vs. Placebo                             | 903  | 5.5 vs. 2.8 (p<0.00001)        | Not improved              | TARGET [147]      |
|                               | Hepatocellular Carcinoma         | Unresectable locally advanced or metastatic / 1st line                                    | Sorafenib (400mg twice daily) vs. Placebo                             | 602  | Not improved **                | 10.7 vs. 7.9 (p<0.001)    | SHARP[148]        |
|                               | Melanoma                         | Metastatic / 2nd line                                                                     | Carboplatin / Paclitaxel ± Sorafenib (400mg twice daily)              | 270  | Not improved                   | Not improved              | PRISM [133]       |
|                               | NSCLC                            | Unresectable locally advanced or metastatic / 1st line                                    | Carboplatin / Paclitaxel ± Sorafenib (400mg twice daily)              | 926  | Not improved                   | Not improved              | ESCAPE [133]      |
| <b>Sunitinib (Sutent®)</b>    | Renal Cell Carcinoma             | Metastatic / 1st line                                                                     | Sunitinib (50mg daily, 4weeks on, 2 weeks off) vs. Interferon alfa-2a | 755  | 11 vs. 5 (p<0.001)             | 26.4 vs. 21.8 (p=0.049)   | NCT00083889[149]  |
|                               | GIST                             | Unresectable locally advanced or metastatic / 2nd line (Imatinib resistant or refractory) | Sunitinib (50mg, 4weeks on, 2 weeks off) vs. Placebo                  | 312  | 27.3 vs. 6.4 weeks (p=<0.0001) | NR                        | SUN1112[150]      |
|                               | Pancreatic neuroendocrine tumors | Unresectable locally advanced or metastatic / 2nd line                                    | Sunitinib (37.5mg daily) vs. Placebo                                  | 117  | 11.4 vs. 5.5 (p<0.001)         | Improved***               | NCT00428597 [151] |

|                              |                          |                                                               |                                                                                                     |      |                               |              |                              |
|------------------------------|--------------------------|---------------------------------------------------------------|-----------------------------------------------------------------------------------------------------|------|-------------------------------|--------------|------------------------------|
|                              | Breast Cancer            | Metastatic / 2nd line                                         | Sunitinib (37.5mg daily) vs. Capecitabine                                                           | 700  | Not improved                  | Not improved | SUN1107 [133] #              |
|                              |                          | Metastatic / 1st line                                         | Sunitinib (25 to 37.5mg, daily) + Paclitaxel vs. BV (10mg/kg, 2-weekly) + Paclitaxel                | 242  | Not improved                  | NR           | SUN1094 #                    |
|                              |                          | Metastatic / 1st line                                         | Docetaxel ± Sunitinib (37.5mg daily)                                                                | 442  | Not improved                  | Not improved | SUN1064 / NCT00393939 **** # |
|                              |                          | Metastatic / 2nd line                                         | Sunitinib (37.5mg daily) vs. Capecitabine                                                           | 594  | Not improved                  | Not improved | SUN1099 / NCT00373113 **** # |
|                              | Hepatocellular Carcinoma | Advanced /                                                    | Sunitinib monotherapy                                                                               |      | NR                            | Not improved | SUN1170 **** #               |
|                              | Colorectal Cancer        | Metastatic / 1st line                                         | FOLFIRI ± Sunitinib (37.5mg daily, 4 weeks on, 2 weeks off) +                                       |      | Not improved                  | Not improved | SUN1122 / NCT00457691 **** # |
|                              | NSCLC                    | Metastatic/ 2nd or 3rd line                                   | Erlotinib ± Sunitinib (37.5mg daily) + Erlotinib                                                    | 960  | 3.6 vs. 2.0 (p=0.023)         | Not improved | SUN1087                      |
|                              | Prostate Cancer          | Metastatic, castration resistant / 2nd line                   | Prednisolone ± Sunitinib (37.5mg, daily)                                                            |      | 24.1 vs. 17.9 weeks (p<0.001) | Not improved | SUN1120 NCT00676650 **** #   |
| <b>Pazopanib (Votrient®)</b> | Renal Cell Carcinoma     | Locally advanced / metastatic / 2nd line                      | Pazopanib (800mg daily) vs. Placebo                                                                 | 435  | 9.2 vs. 4.2 (p<0.0001)        | Not improved | VEG105192 [152]              |
| <b>Vandetanib</b>            | NSCLC                    | Unresectable locally advanced or metastatic / 2nd line        | Docetaxel. ± Vandetanib (100mg daily)                                                               | 1391 | 4.0 vs. 3.2 (p<0.0001)        | Not improved | ZODIAC [154]                 |
|                              |                          | Unresectable locally advanced or metastatic / 2nd or 3rd line | Vandetanib (300mg daily) vs. Erlotinib                                                              | 1240 | Not improved                  | Not improved | ZEST [133]                   |
|                              |                          | Unresectable locally advanced or metastatic / 2nd line        | Pemetrexed ± Vandetanib (100mg daily)                                                               | 534  | Not improved                  | Not improved | ZEAL [133]                   |
| <b>Vatalanib / PTK 787</b>   | Colorectal Cancer        | Metastatic / 2nd line                                         | FOLFOX ± Vatalanib (1250mg daily)                                                                   | 855  | 5.0 vs. 4.1 (p=0.026)         | Not improved | CONFIRM2 [133]               |
|                              |                          | Metastatic / 1st line                                         | FOLFOX ± Vatalanib (1250mg daily)                                                                   | 1168 | Not improved                  | Not improved | CONFIRM1 [133]               |
| <b>Cediranib</b>             | Colorectal Cancer        | Metastatic / 1st line                                         | Modified FOLFOX + Cediranib (20 or 30mg daily) vs. modified FOLFOX + Bevacizumab (5mg/kg, 2-weekly) | 1422 | Not improved                  | Not improved | HORIZON III [156]            |
|                              |                          | Metastatic / 1st line                                         | FOLFOX/CAPOX ± Cediranib (20 and 30mg daily)                                                        | 860  | Not improved                  | Not improved | HORIZON II                   |

|                 |                      |                                    |                                                                    |     |                        |              |                             |
|-----------------|----------------------|------------------------------------|--------------------------------------------------------------------|-----|------------------------|--------------|-----------------------------|
|                 | Glioblastoma         | Recurrent 2nd line                 | Cediranib (30mg) vs Cediranib 30mg daily + Lomustine vs. Lomustine | 325 | Not improved           | Not improved | REGAL / NCT00777153<br>**** |
| <b>Axitinib</b> | Renal Cell Carcinoma | Metastatic / 2nd line              | Axitinib (5 mg twice daily) vs. Sorafenib (400mg twice daily)      | 732 | 8.3 vs. 5.7 (p<0.0001) | Not improved | NCT00678392 [157]           |
|                 | Pancreatic Cancer    | Metastatic and advanced / 1st line | Gemcitabine ± Axitinib (5 to 10mg daily)                           | 630 | Not improved           | Not improved | NCT00471146                 |

- <sup>a</sup> anti-angiogenic treatment vs. non-anti-angiogenic treatment if not mentioned otherwise
- <sup>b</sup> referring to treatment setting: 1<sup>st</sup> line; 2<sup>nd</sup> line ; 3<sup>rd</sup> line
- BV: bevacizumab; NR: not reported
- \* Different agents including Capecitabine, protein-bound Paclitaxel, Paclitaxel, Docetaxel, Gemcitabine, Vinorelbine.
- \*\* no difference in median time to symptomatic progression, statistical significant difference in median time to radiologic progression (5.5 vs. 2.8 month; p<0.001).
- \*\*\* The study was discontinued after independent data and safety monitoring committee observed more serious adverse events and deaths in the placebo group.
- \*\*\*\* citation not available
- # Study discontinued by investigator.
- § pathological complete response: surrogate marker for long-term outcome.
